# Supplementary material for: AICDA drives epigenetic heterogeneity and accelerates germinal center-derived lymphomagenesis
Source: PubMed Central journal article supplement (PMC5768781; doi:10.1038/s41467-017-02595-w), 2018-01-15
Supplement: 41467_2017_2595_MOESM3_ESM.pdf [file 41467_2017_2595_MOESM3_ESM.pdf]

## **Description of Additional Supplementary Files**

File Name: Supplementary Data 1

Description: Genes over-representing AICDA-perturbed CpG signature.

File Name: Supplementary Data 2

Description: Leading edge genes showing AICDA-perturbed, down-regulated genes in mouse and human lymphoma.
